# Supplementary material for: Realization of a lateral directional order in nematic and smectic A phases of rodlike molecules by using perfluoroarene–arene interactions
Source: Royal Society of Chemistry journal article supplement (doi:10.1039/c0sm01459a), 2011-01-01
Supplement: c0sm01459a.pdf [file c0sm01459a.pdf]

## Realization of a lateral directional order in nematic and smectic A phases of rodlike molecules by using perfluoroarene-arene interaction

*Keiki Kishikawa, Sumihiro Aikyo, Seiji Akiyama, Takahiro Inoue, Masahiro Takahashi, Shiki Yagai, Hiroaki Aonuma, Shigeo Kohmoto*

### Electronic Supplementary Information

#### Polarized microphotographs of F-BB-F

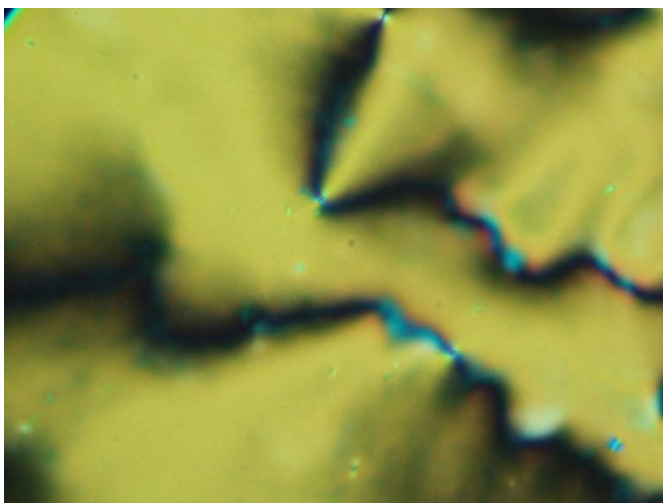

**Fig. S1.** Two-brush disclinations of **F-BB-F** in the nematic phase (210°C, 500x). There is a small light-blue area at each disclination center.

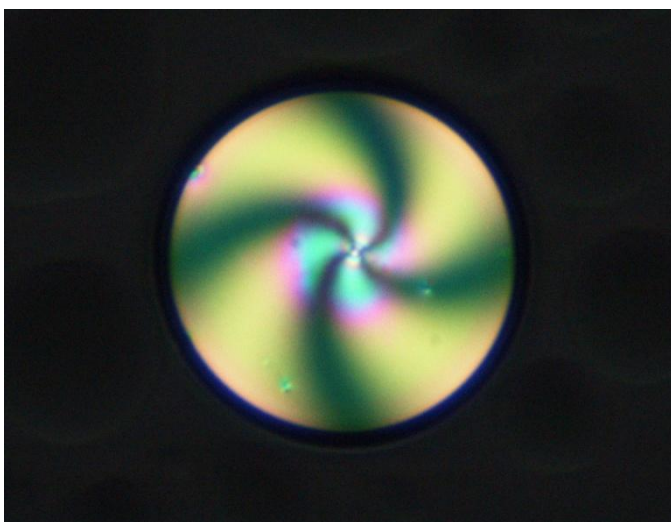

**Fig. S2.** A droplet of **F-BB-F** in the nematic phase (210°C, 500x) on cooling. The four-brush disclination has a bright center and it was surrounded by the light-blue part .

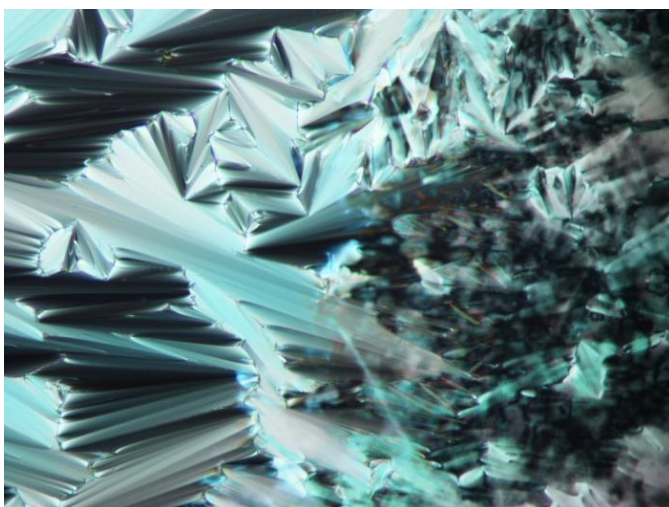

**Fig. S3.** The transition of **F-BB-F** from the smectic A phase (left) to the nematic phase (right) on heating. In the nematic phase, smectic-like texture remained after the transition. (205°C, 200x)

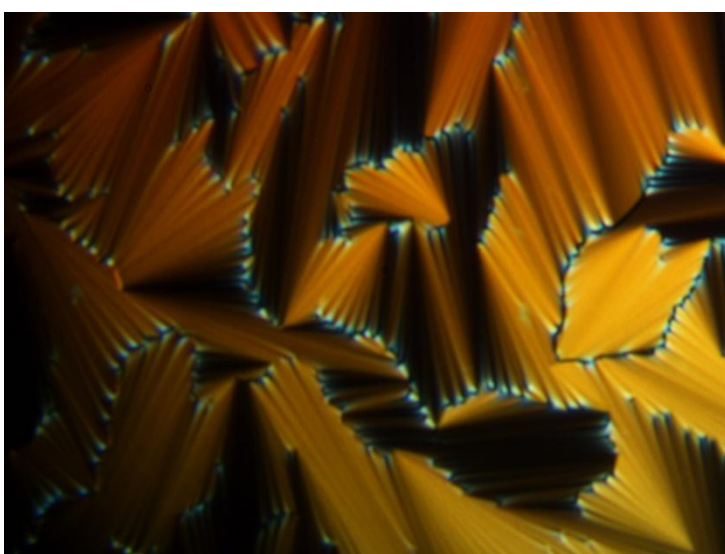

**Fig. S4.** Fan-shaped textures of **F-BB-F** in the smectic A phase on cooling under applying a vertical magnetic field to the glass plate. The smectic A phase could not be aligned by applying a magnetic field. (200°C, 500x)

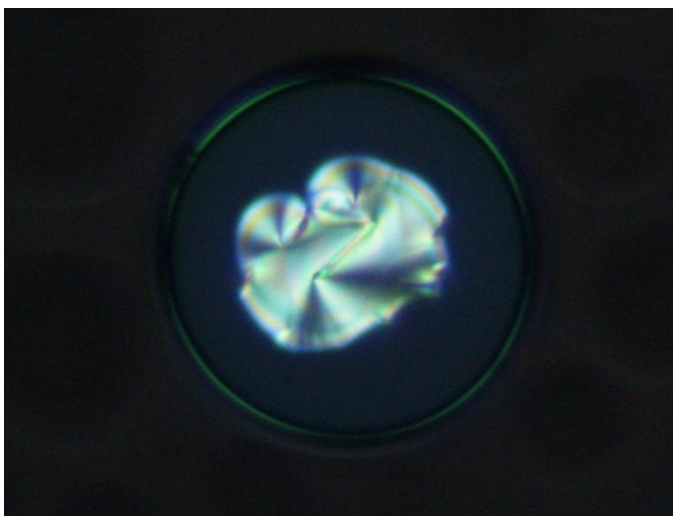

**Fig. S5.** A droplet of **F-BB-F** in the smectic A phase on cooling (200°C, 500x). There are focal-conic textures at the center of the droplet, and the homeotropically aligned part around the texture.
